# Supplementary material for: Challenging Linguistic Relativism in Numerical Cognition: A Preregistered Crosslinguistic Study on the Perception of Ordinality
Source: Research Square preprint supplement (doi:10.21203/rs.3.rs-7991810/v1), 2025-11-19
Supplement: Supplementary file 1 [file 8916f314386241fac3a77962.docx]

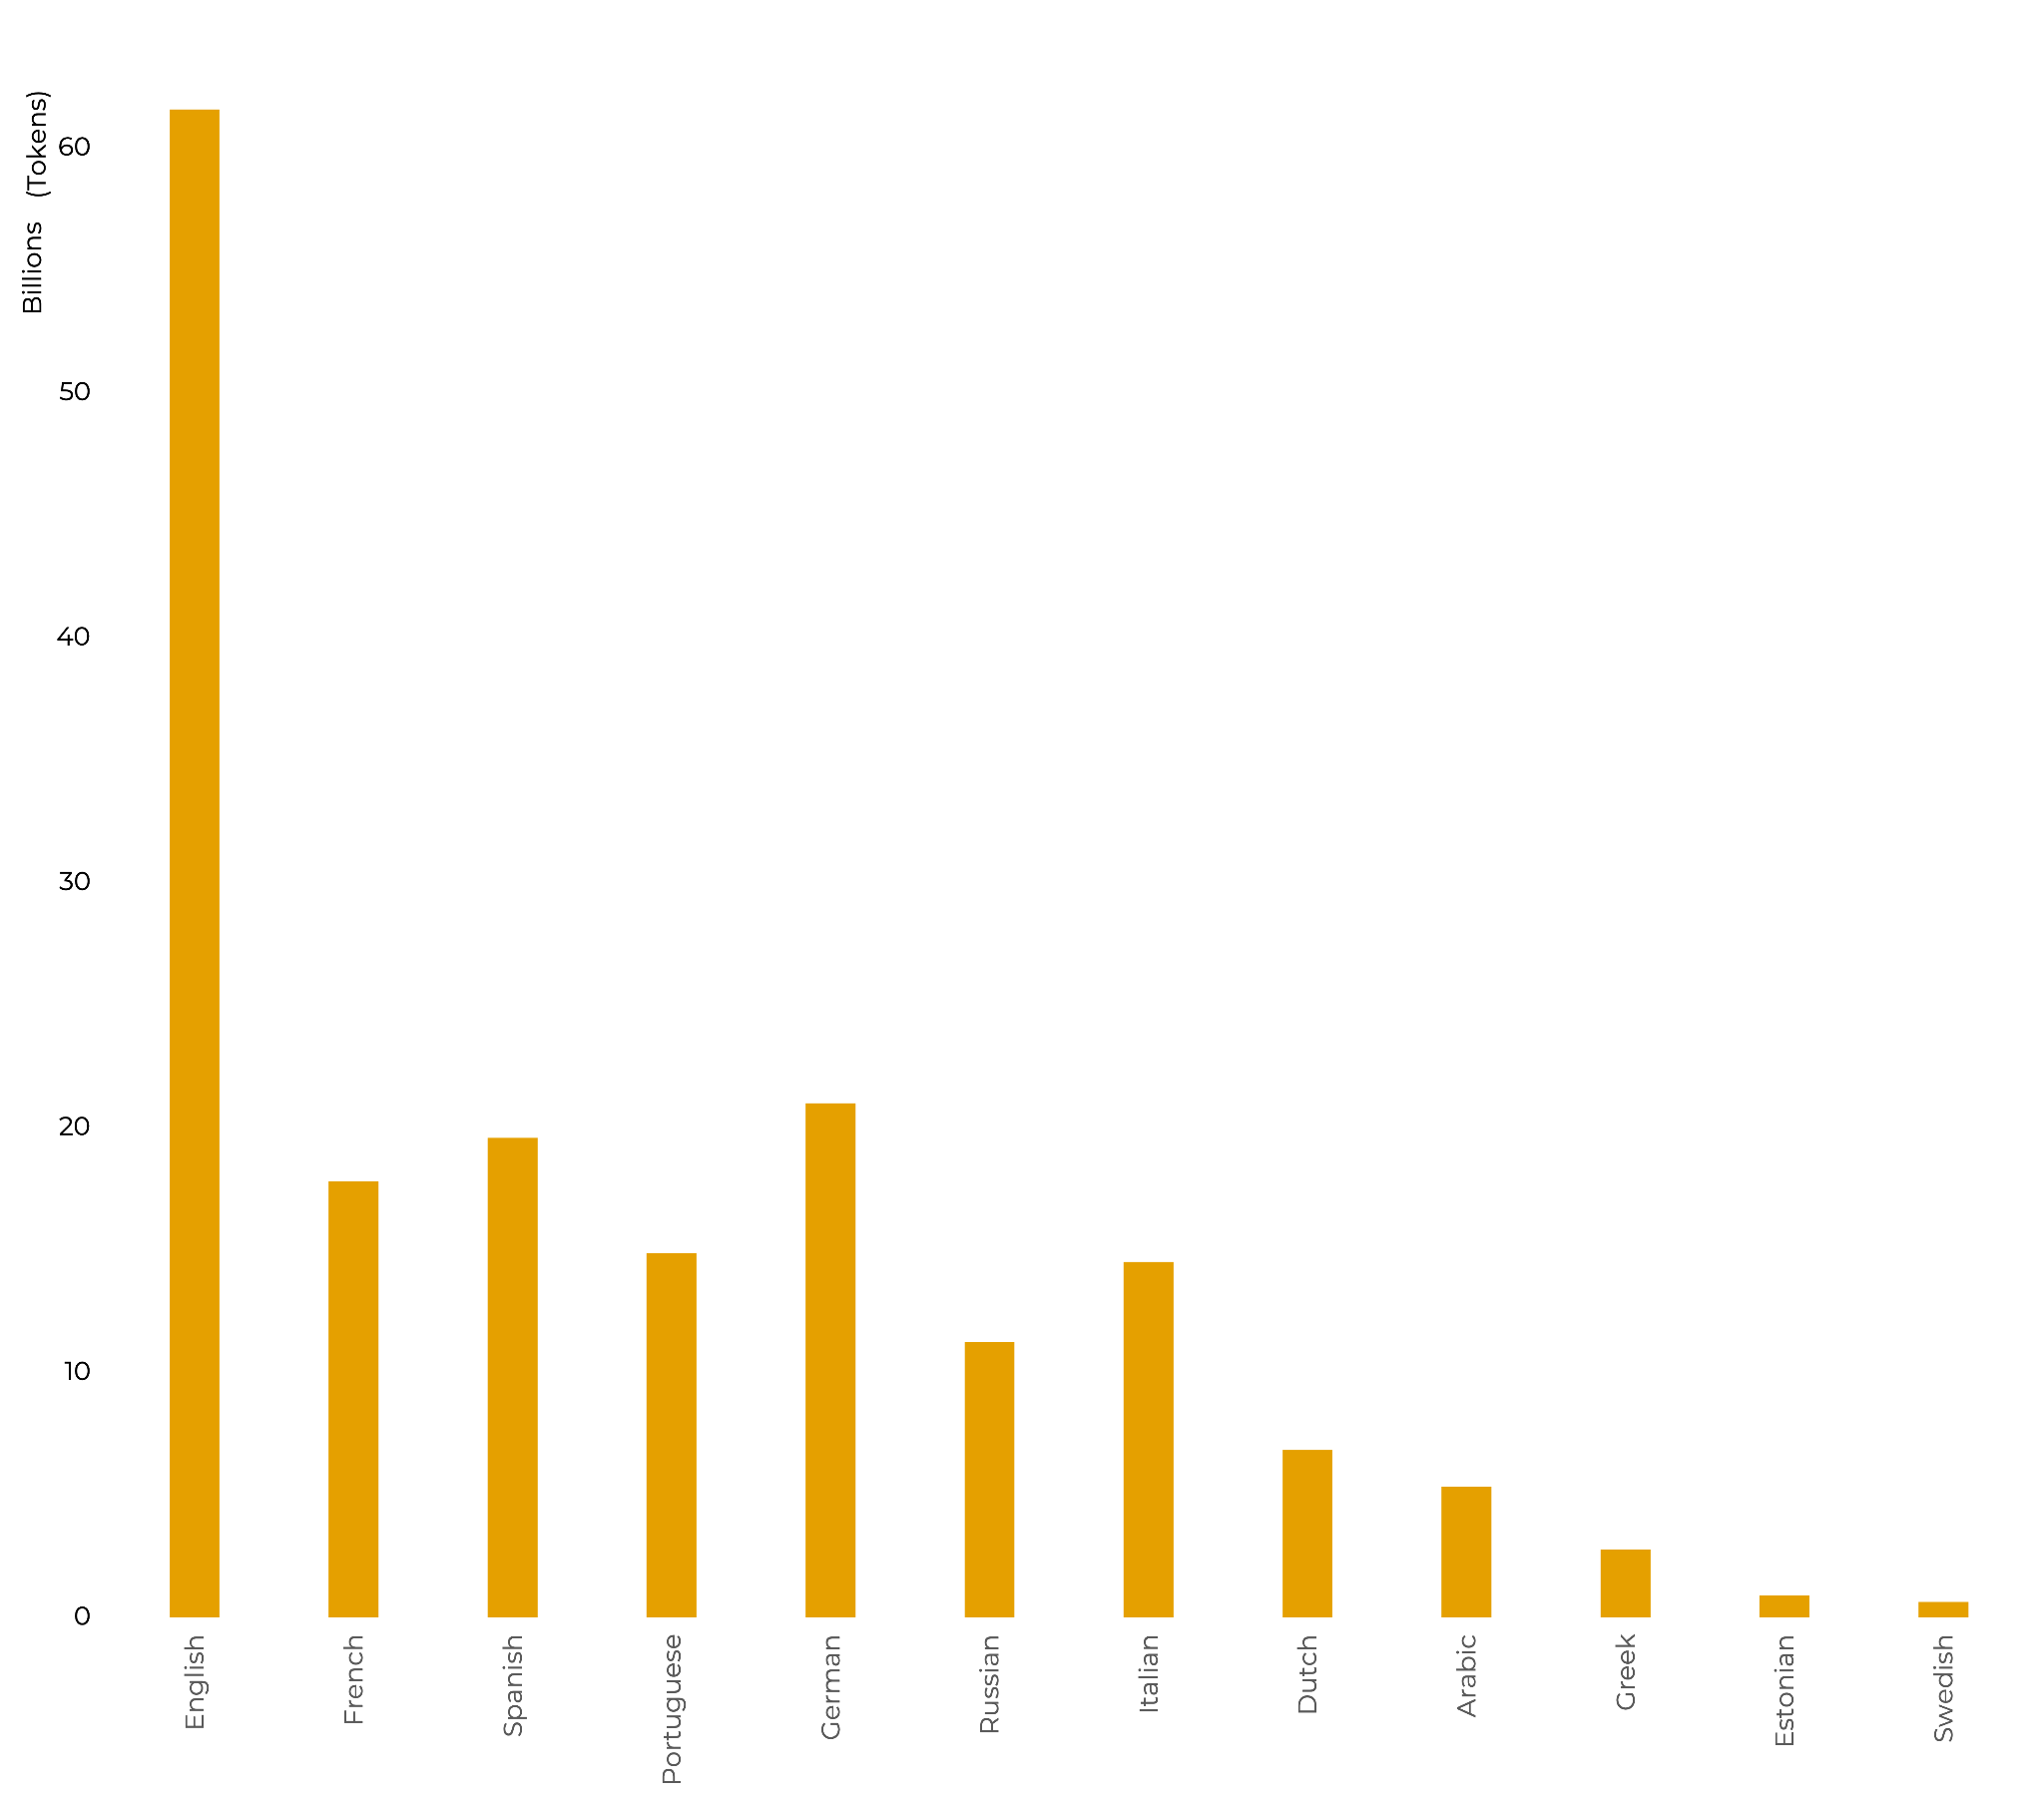


**Figure A**: Corpus size on SketchEngine *(in billions of tokens)*


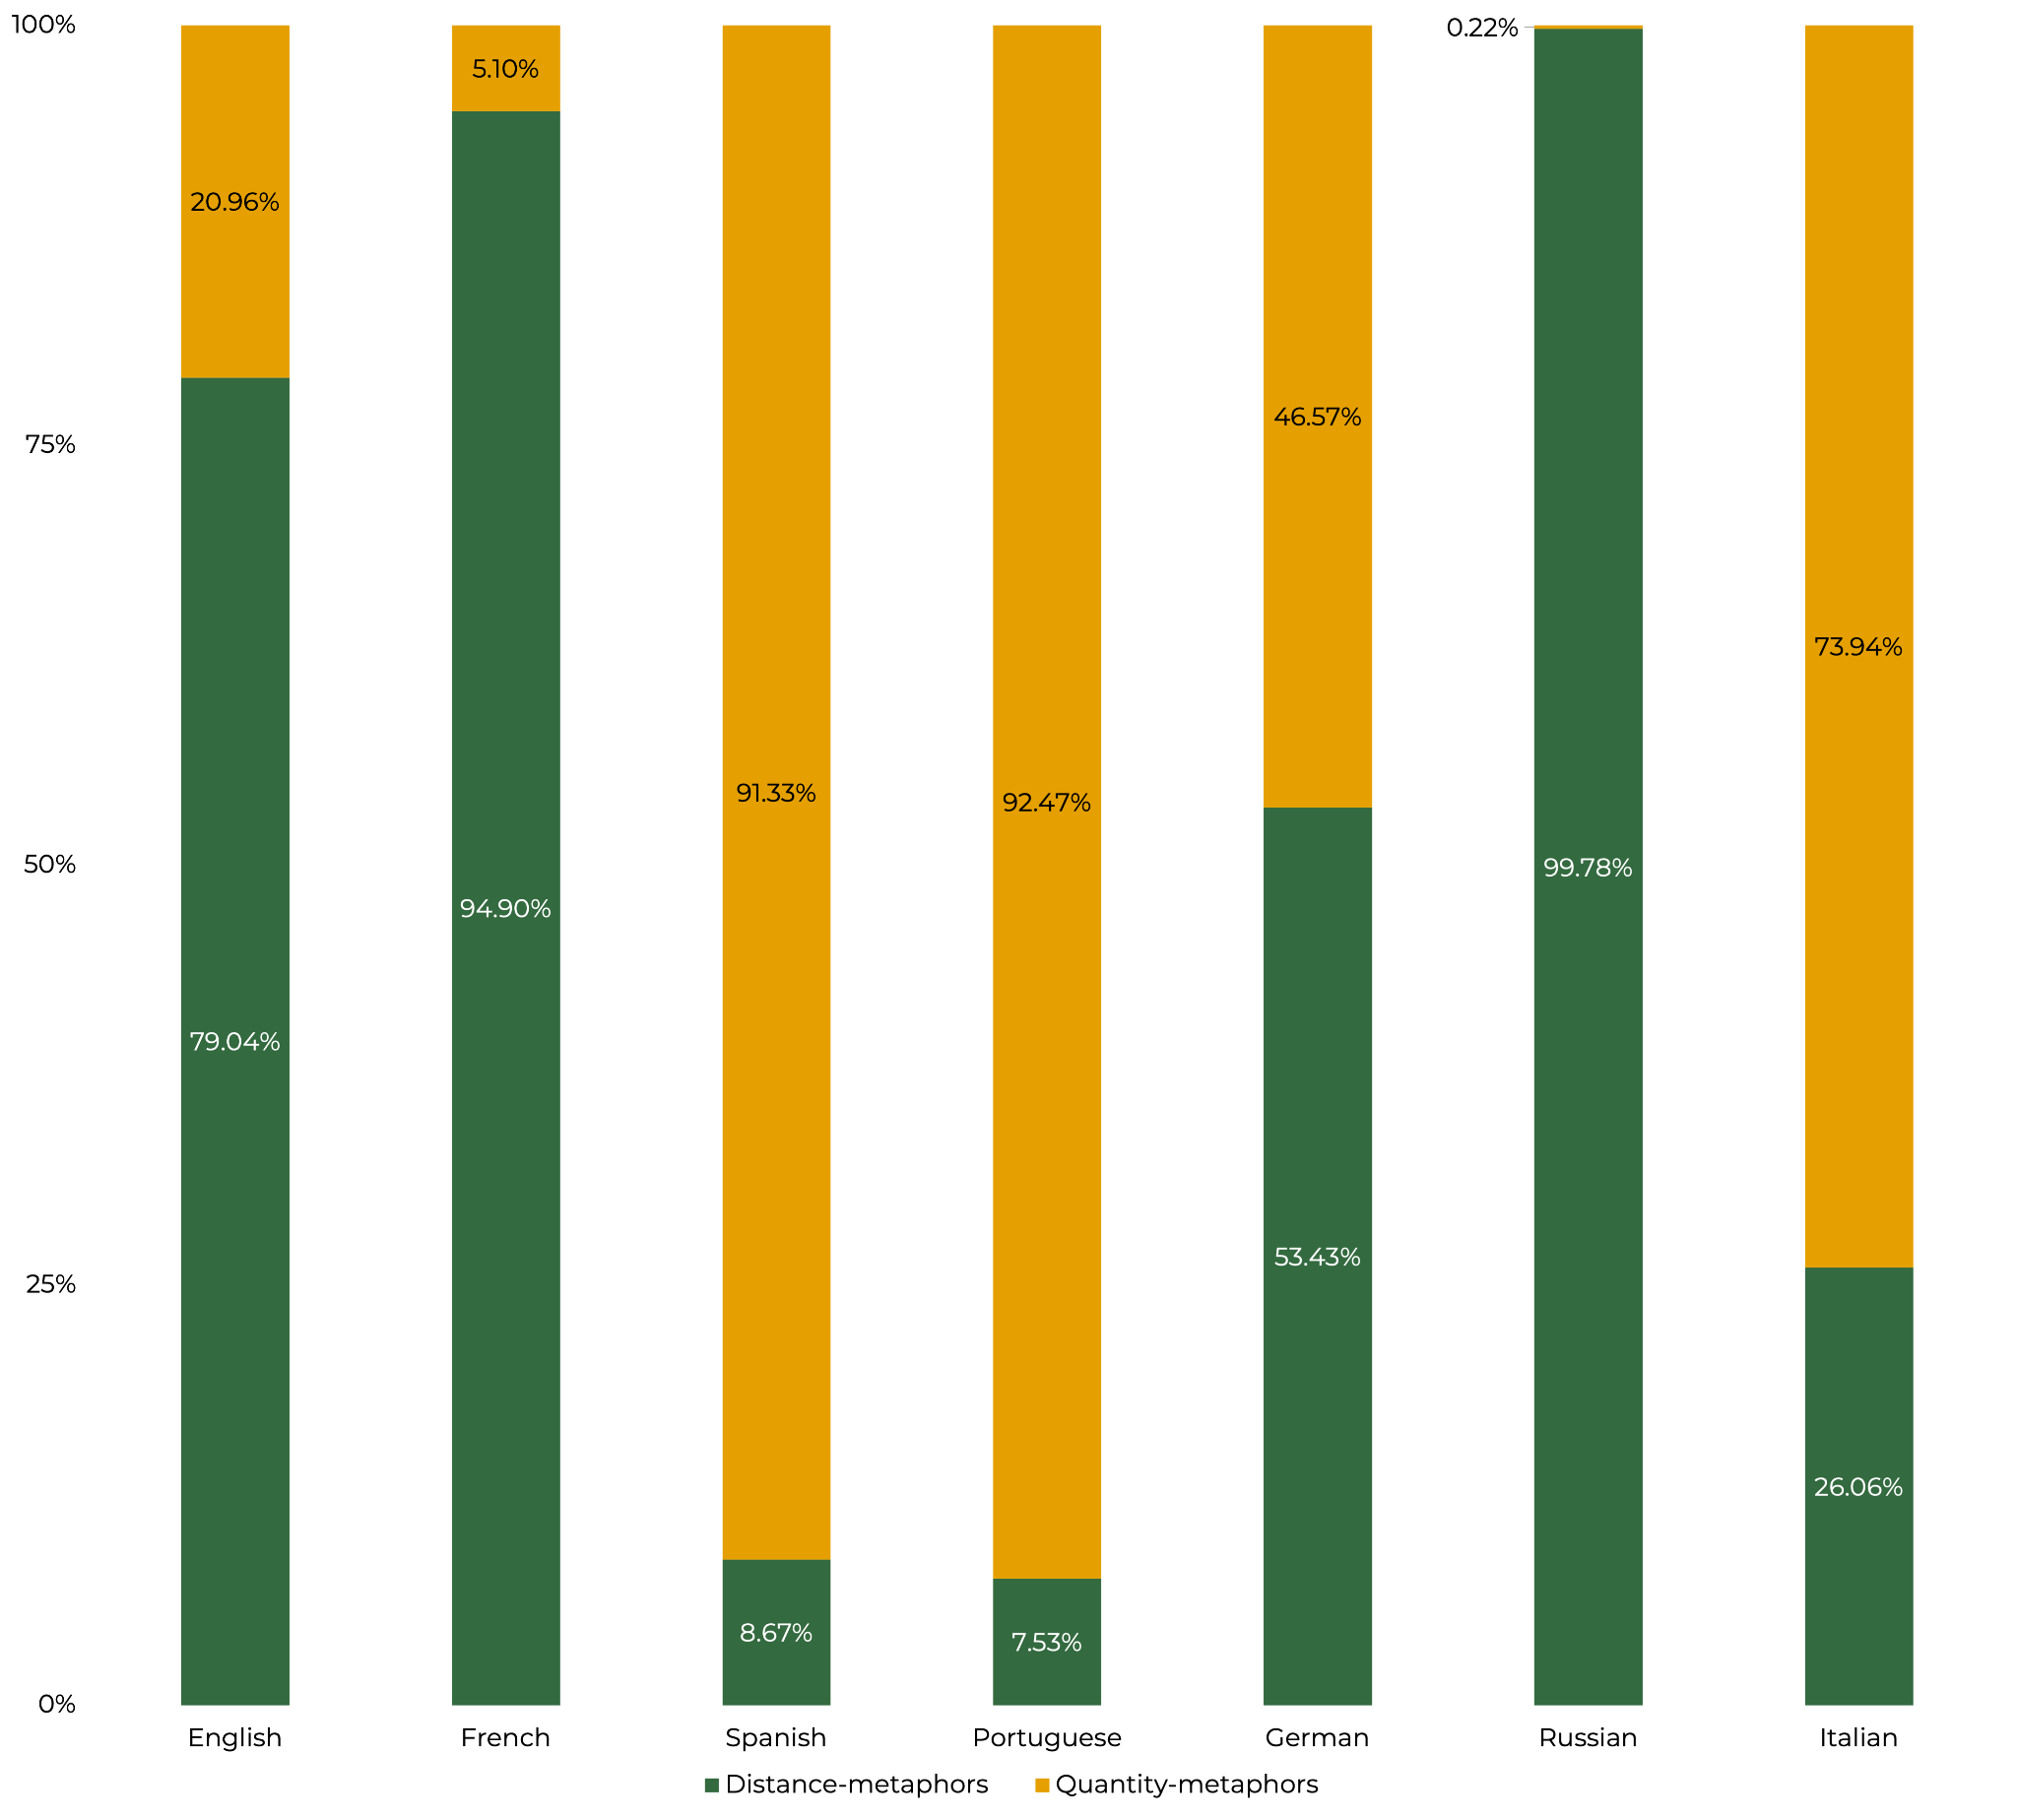


**Figure B:** Corpus Analysis on SketchEngine. *Relative frequencies of metaphor usage across languages.*
